# Supplementary material for: Preparation of COPs Mixed Matrix Membrane for Sensitive Determination of Six Sulfonamides in Human Urine
Source: MDPI journal article supplement (doi:10.3390/molecules28217336), 2023-10-30
Supplement: s1 [file s1]

## Electronic Supplementary Information

# Preparation of COPs Mixed Matrix Membrane for Sensitive Determination of Six Sulfonamides in Human Urine

Ying Liu <sup>1</sup>, Yong Zhang <sup>1</sup>, Jing Wang <sup>2</sup>, Kexin Wang <sup>1</sup>, Shuming Gao <sup>1</sup>, Ruiqi Cui <sup>1</sup>, Fubin Liu <sup>1</sup>  
and Guihua Gao <sup>1,\*</sup>

<sup>1</sup> School of Pharmacy, Jining Medical University, Rizhao 276826, China;  
ying1737883492@126.com (Y.L.); zhang\_2211@163.com (Y.Z.); tawkx589@163.com (K.W.);  
17860202743@163.com (S.G.); 13697839528@163.com (R.C.); liufblvy@163.com (F.L.)

<sup>2</sup> School of Pharmacy, Shandong University of Traditional Chinese Medicine, Jinan 250355, China;  
wangjing20210903@163.com

\* Correspondence: guihua526@163.com; Fax: +86-633-2983690

## **Content List**

1. The preparation procedure of TpDMB-COPs-MMM (Figure S1), Page 3
2. The TGA curve of TpDMB-COPs powder (Figure S2), Page 4
3. The N<sub>2</sub> adsorption-desorption isotherms of TpDMB-COPs powder (Figure S3), Page 5
4. Reusability of TpDMB-COPs-MMM (Figure S4), Page 6
5. The chromatograms of spiked and real samples (Figure S5), Page 7
6. The chemical structure of six sulfonamides (Table S1), Page 8
7. The results of precision (Table S2), Page 9
8. The results of recoveries experiment (Table S3), Page 9

# 1. The preparation procedure of TpDMB-COPs-MMM

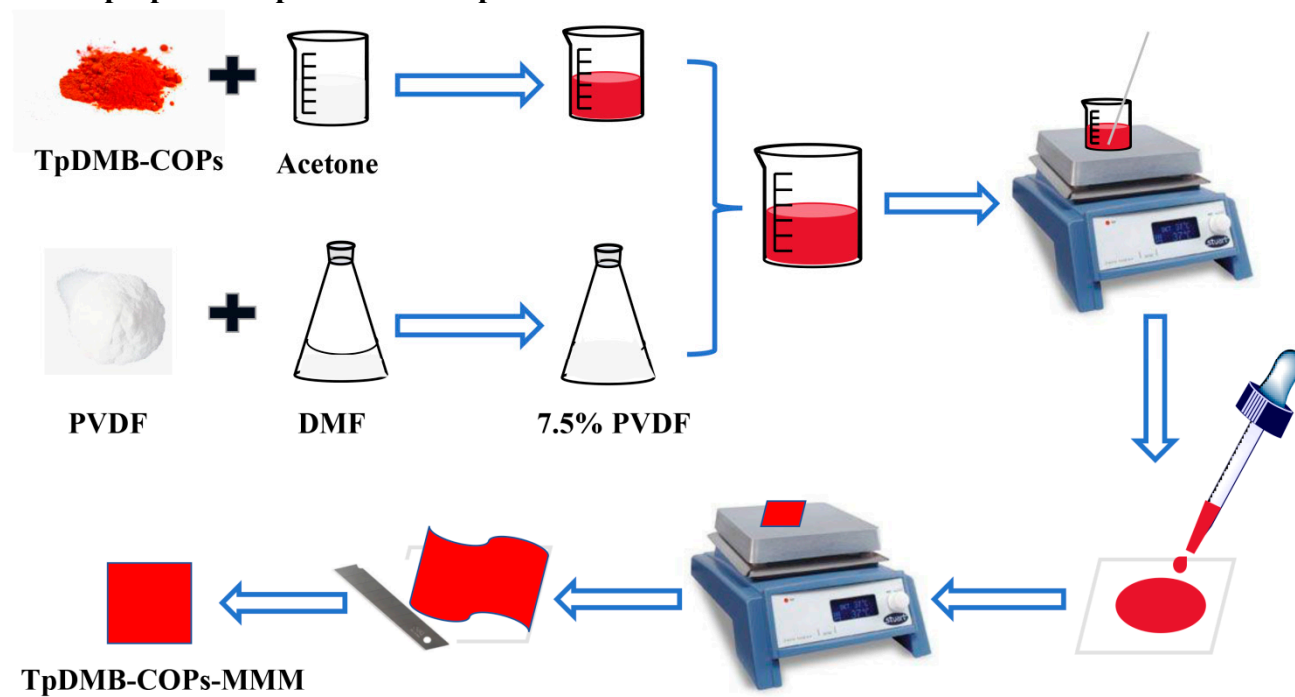

**Figure S1 1.** The preparation procedure of TpDMB-COPs-MMM.

## 2. The TGA curve of TpDMB-COPs powder

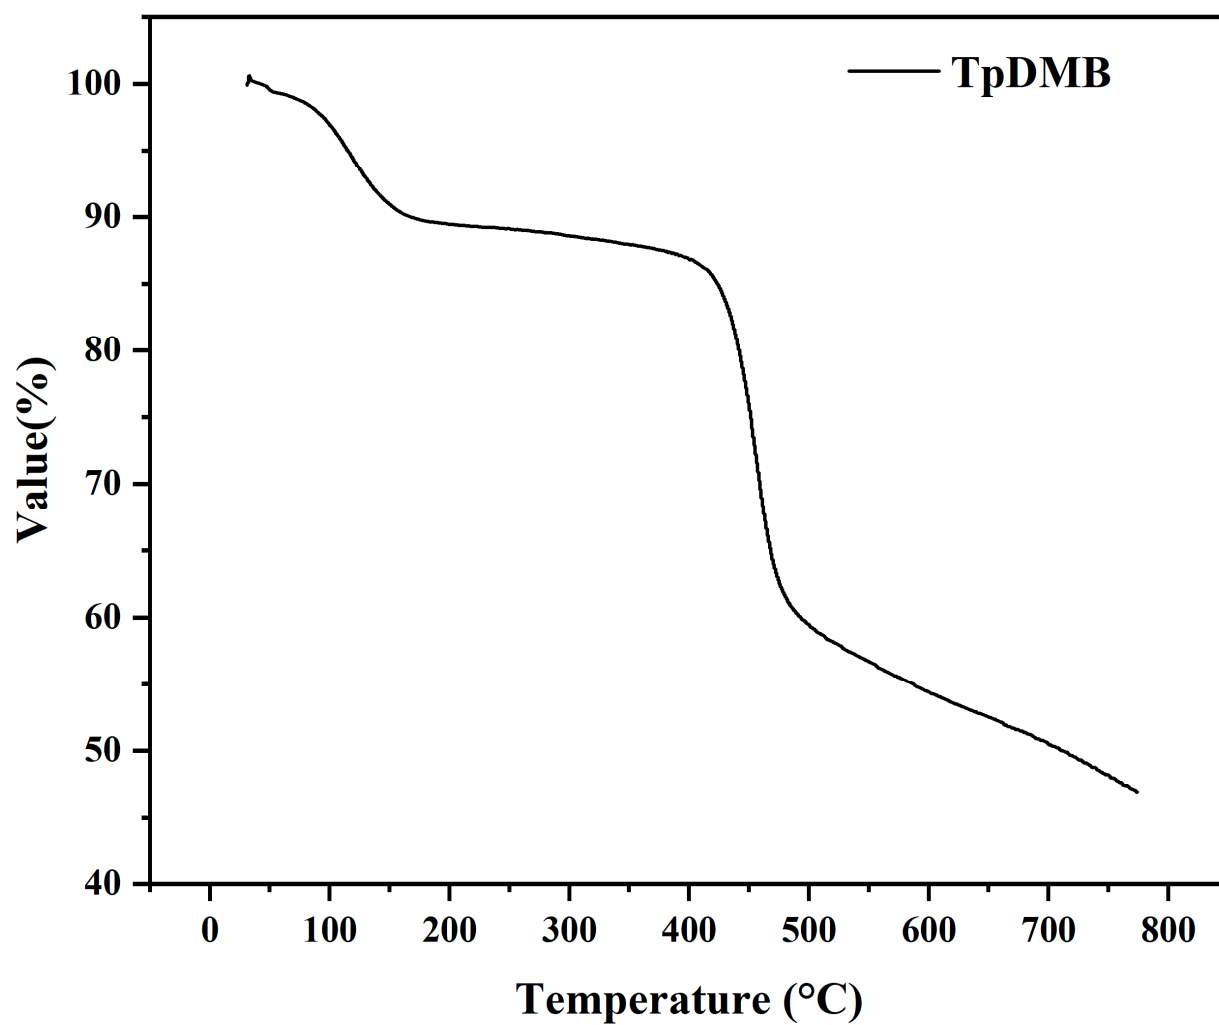

Figure S2 The TGA curve of TpDMB-COPs powder.

### 3. The N<sub>2</sub> adsorption-desorption isotherms of TpDMB-COPs powder

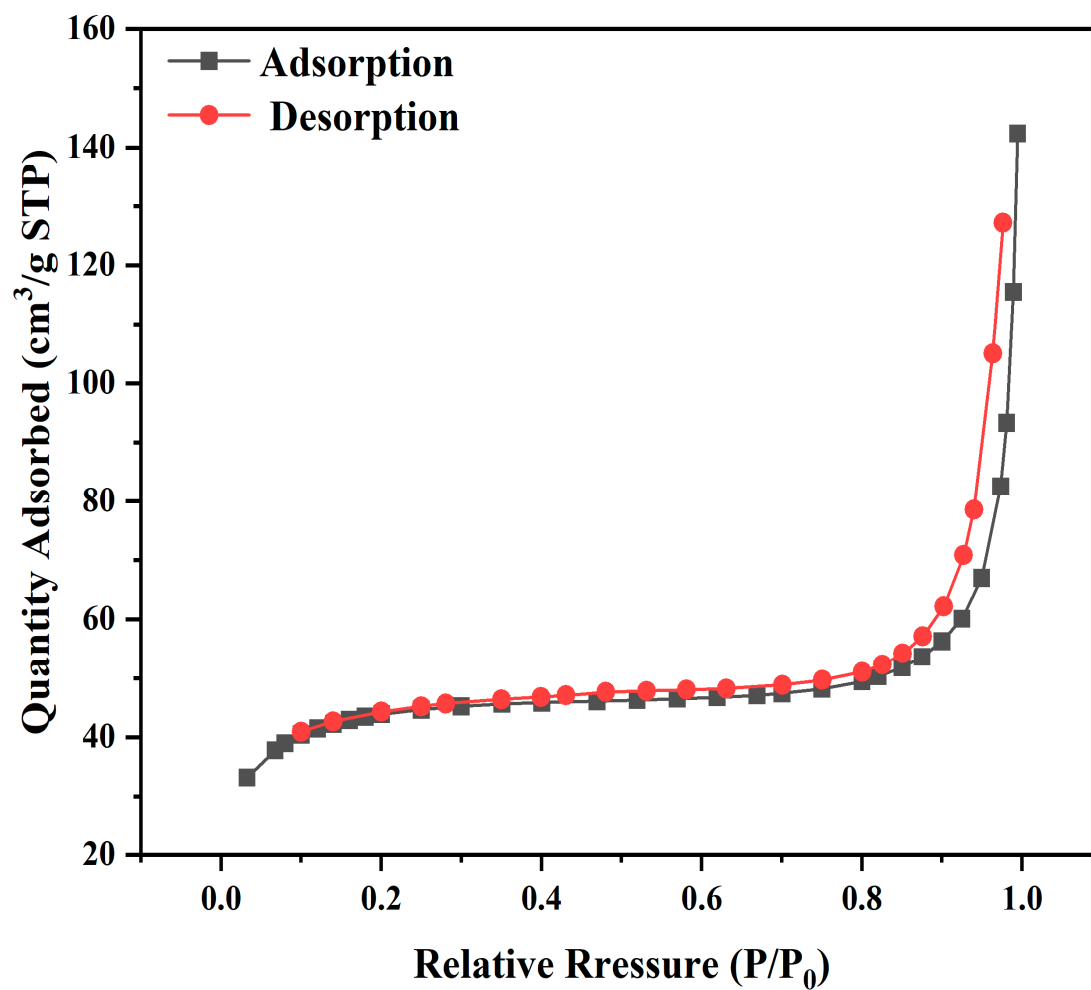

**Figure S3** The N<sub>2</sub> adsorption-desorption isotherms of TpDMB-COPs powder.

#### 4. The Reusability of TpDMB-COPs-MMM

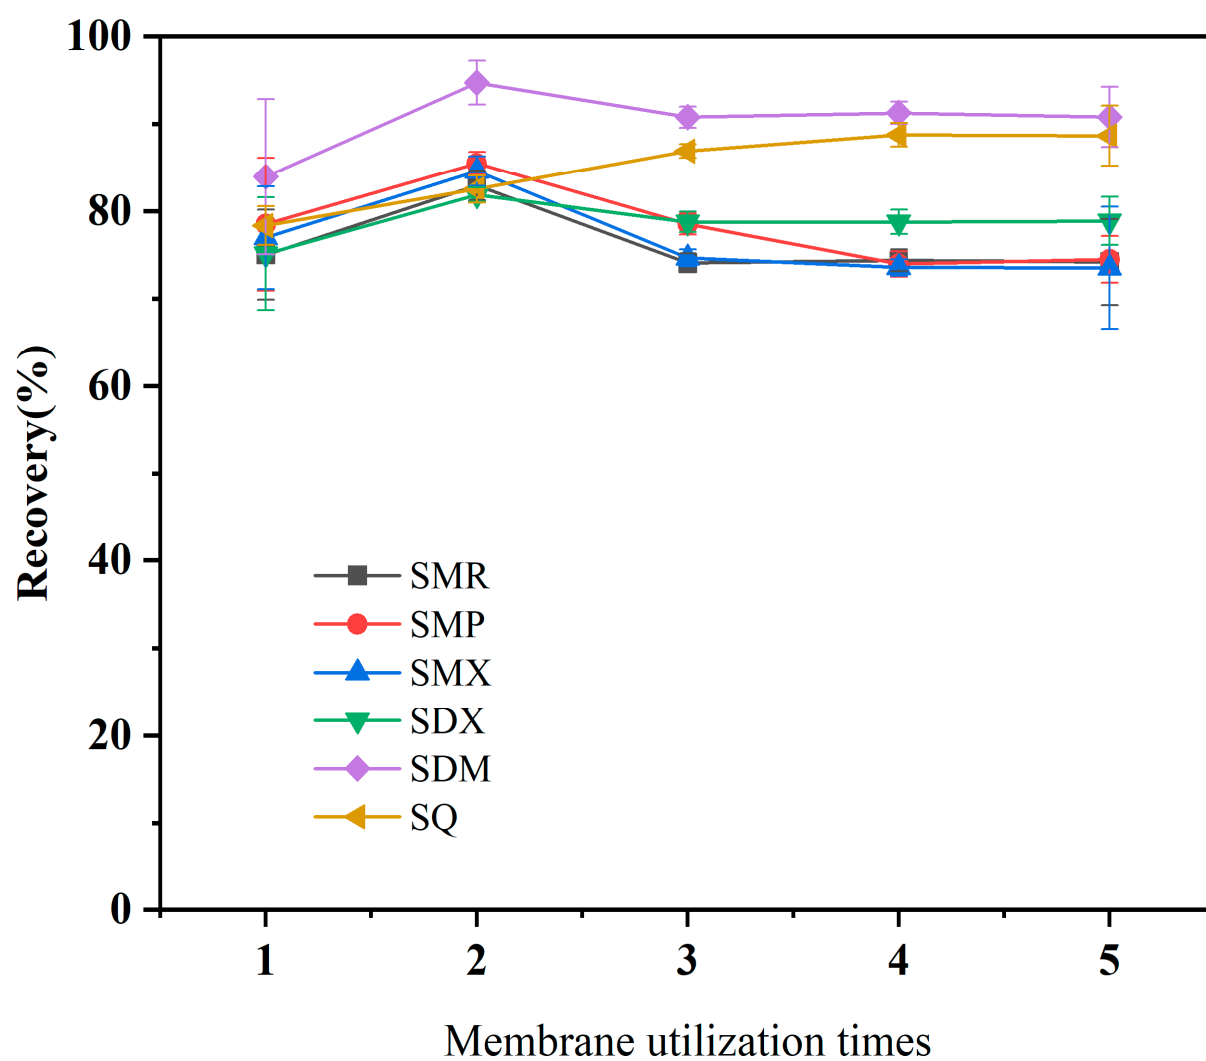

Figure S4 Reusability of TpDMB-COPs-MMM.

## 5. The chromatograms of spiked and real samples

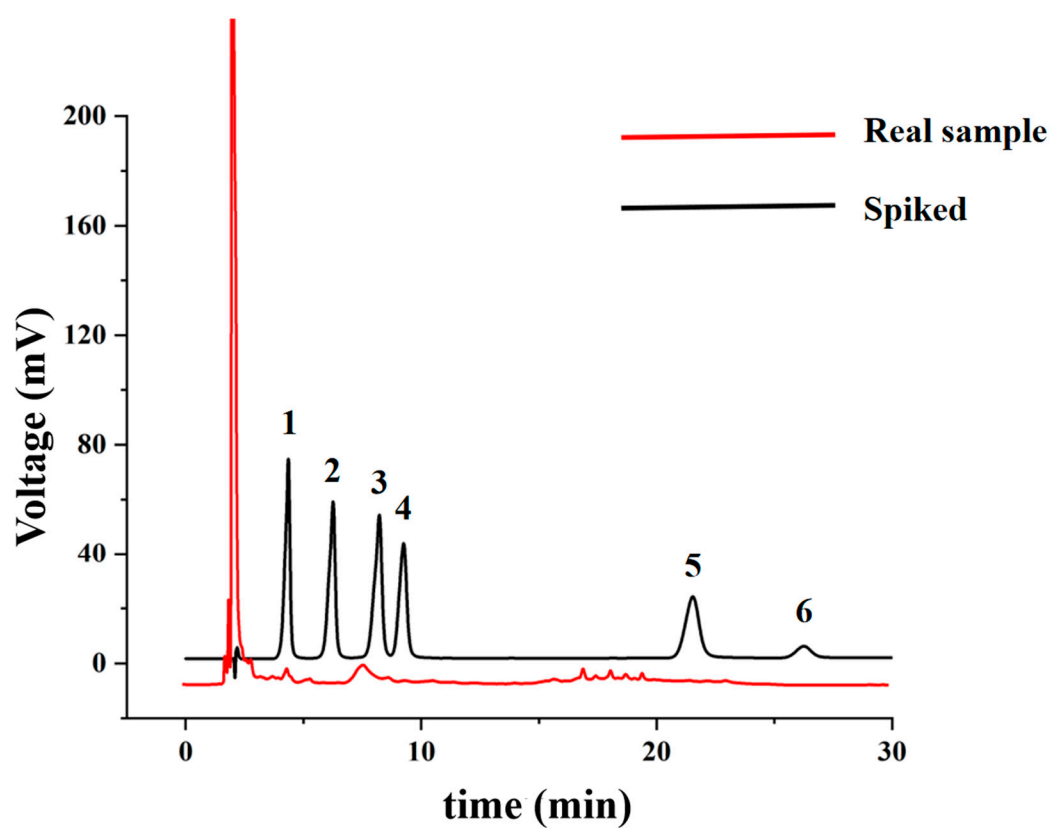

**Figure S5** The chromatograms of spiked and real samples. Peak identification: 1, SMR; 2, SMP; 3, SMX; 4, SDX; 5, SDM; 6, SQ

## 6. The chemical structure of six sulfonamides

**Table S1** The chemical structure of six sulfonamides

| Sulfonamides                 | Chemical structure                                                                   |
|------------------------------|--------------------------------------------------------------------------------------|
| Sulfamerazine (SMR)          | 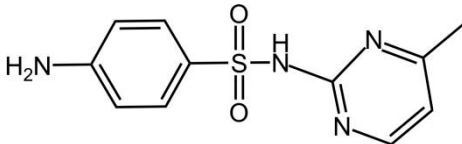   |
| Sulfamethoxypyridazine (SMP) |    |
| Sulfamethizole (SMX)         |   |
| Sulfadimethoxine (SDM)       |  |
| Sulfadoxine (SDX)            |  |
| Sulfaquinoxaline (SQ)        |  |



## 7. Results of precision

**Table S2** Results of precision

| Analyses | Repeatability<br>(RSD%, n=6) | Intra-day<br>(RSD%, n=6) | Inter-day<br>(RSD%, n=9) |
|----------|------------------------------|--------------------------|--------------------------|
| SMR      | 6.8                          | 2.5                      | 3.8                      |
| SMP      | 4.1                          | 2.9                      | 4.7                      |
| SMX      | 5.1                          | 4.3                      | 4.4                      |
| SDX      | 3.7                          | 1.7                      | 2.4                      |
| SDM      | 7.3                          | 1.7                      | 1.5                      |
| SQ       | 5.0                          | 4.5                      | 5.0                      |

## 8. The results of recoveries experiment

**Table S3** The results of recoveries experiment

| Analytes | Low <sup>a</sup> |     | Middle <sup>b</sup> |     | High <sup>c</sup> |     |
|----------|------------------|-----|---------------------|-----|-------------------|-----|
|          | Repeatability    | RSD | Repeatability       | RSD | Repeatability     | RSD |
|          | (%)              | (%) | (%)                 | (%) | (%)               | (%) |
| SMR      | 109.6            | 7.9 | 92.6                | 4.1 | 110.8             | 4.1 |
| SMP      | 102.2            | 5.2 | 96.4                | 1.7 | 102.3             | 4.3 |
| SMX      | 98.8             | 3.8 | 104.3               | 1.1 | 91.2              | 3.4 |
| SDX      | 106.1            | 7.5 | 87.4                | 5.6 | 110.6             | 5.3 |
| SDM      | 108.1            | 7.4 | 91.1                | 2.7 | 112.2             | 2.5 |
| SQ       | 92.9             | 8.7 | 87.9                | 6.4 | 90.7              | 6.2 |

a: The low concentrations of SMR, SMP, SMX, SDX, SDM, SQ were 7 ng/mL, 10 ng/mL, 14 ng/mL, 14 ng/mL, 14 ng/mL, 7 ng/mL, respectively.

b: The middle concentrations of SMR, SMP, SMX, SDX, SDM, SQ were 10 ng/mL, 15 ng/mL, 15 ng/mL, 15 ng/mL, 15 ng/mL, 10 ng/mL, respectively.

c: The high concentrations of SMR, SMP, SMX, SDX, SDM, SQ were 16 ng/mL, 20 ng/mL, 20 ng/mL, 20 ng/mL, 20 ng/mL, 16 ng/mL, respectively.
